# Supplementary material for: The visual detection of anesthetics in fish based on an inverse opal photonic crystal sensor
Source: Royal Society of Chemistry journal article supplement (doi:10.1039/c9ra01600g), 2019-01-01
Supplement: c9ra01600g1.pdf [file c9ra01600g1.pdf]

## Supplementary Tables

**Table S1** The relation between the dosage of reactants and SiO<sub>2</sub> diameters

| Number | Water (mL) | Anhydrous ethanol (mL) | Ammonia (mL) | TEOS (mL) | Average particle size of SiO <sub>2</sub> (nm) |
|--------|------------|------------------------|--------------|-----------|------------------------------------------------|
| 1      | 24.75      | 61.75                  | 2.25         | 4.5       | 172                                            |
| 2      | 24.75      | 61.75                  | 4.5          | 4.5       | 450                                            |
| 3      | 24.75      | 61.75                  | 9.0          | 4.5       | 495                                            |
| 4      | 24.75      | 61.75                  | 13.5         | 4.5       | 551                                            |
| 5      | 24.75      | 61.75                  | 4.5          | 9.0       | 511                                            |
| 6      | 24.75      | 61.75                  | 4.5          | 13.5      | 612                                            |
| 7      | 24.75      | 61.75                  | 4.5          | 18        | 806                                            |

**Table S2** The comparison between the theoretic  $\lambda_{\max}$  and experimental  $\lambda_{\max}$  of PCs

|                                    |       |       |       |       |       |
|------------------------------------|-------|-------|-------|-------|-------|
| SiO <sub>2</sub> sizes (nm)        | 232   | 281   | 304   | 323   | 356   |
| Theoretic $\lambda_{\max}$ (nm)    | 538   | 652   | 705   | 750   | 826   |
| Experimental $\lambda_{\max}$ (nm) | 558   | 662   | 707   | 757   | 842   |
| Relative error                     | 3.58% | 1.51% | 0.28% | 0.92% | 1.90% |

## Supplementary Figures

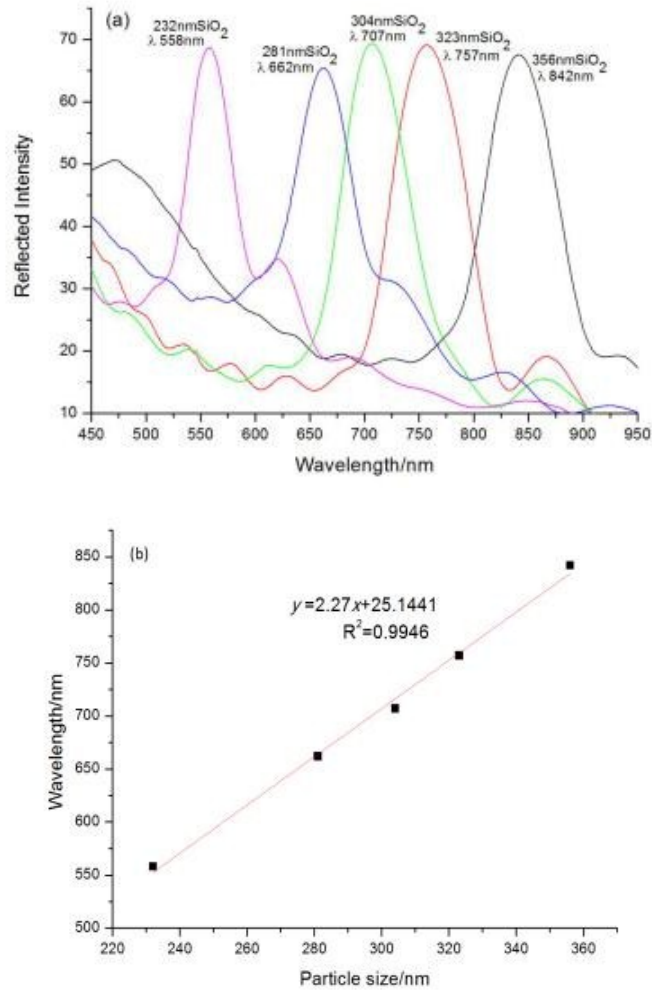

**Fig. S1** (a) Diffraction spectrum of PCs; (b) The calibration curve between  $\lambda_{\max}$  of diffraction peak and particle size of SiO<sub>2</sub>.

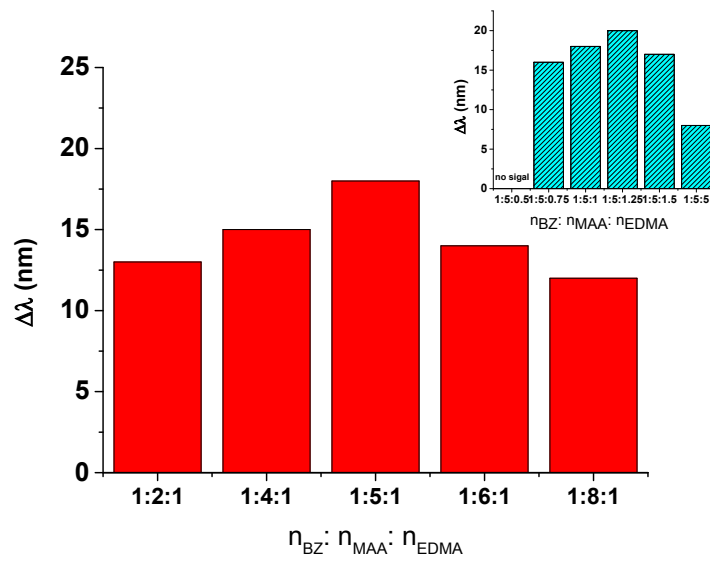

**Figure S2.** Effect of molar ratio of imprinted molecule, functional monomer and

crosslinker on optical diffraction of MIPC
